# Supplementary material for: Fetal hepatocytes protect the HSPC genome via fetuin-A
Source: PubMed Central journal article supplement — Nature. 2024 Dec 4;637(8045):402–11. doi: 10.1038/s41586-024-08307-x (PMC11711094; doi:10.1038/s41586-024-08307-x), 2024-12-04

**Supplementary information**

---

**Fetal hepatocytes protect the HSPC genome  
via fetuin-A**

---

In the format provided by the  
authors and unedited

**Supplementary Figure 1: The flow-cytometric gating strategy for LSK cells, HSCs and MPPs.**

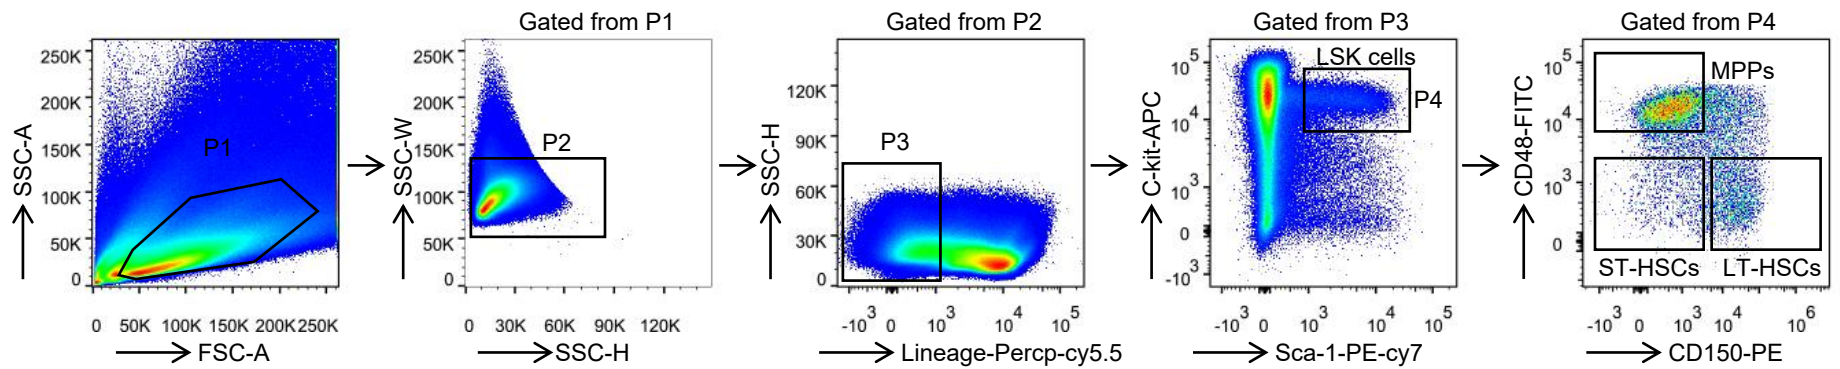

Supplement: 41586_2024_8307_MOESM1_ESM.pdf [file 41586_2024_8307_MOESM1_ESM.pdf]
