# Supplementary material for: Fetal hepatocytes protect the HSPC genome via fetuin-A
Source: PubMed Central journal article supplement — Nature. 2024 Dec 4;637(8045):402–11. doi: 10.1038/s41586-024-08307-x (PMC11711094; doi:10.1038/s41586-024-08307-x), 2024-12-04

**Supplementary Figure 2: Uncropped western blots associated with Fig. 4 and Extended Data Figs. 5, 6.**

Fig.4c

Same batch of lysates; resolved on different gels; P-Junb, Junb, P-Fosl1, the same gel; lane1: FetuA-, lane2: FetuA+.

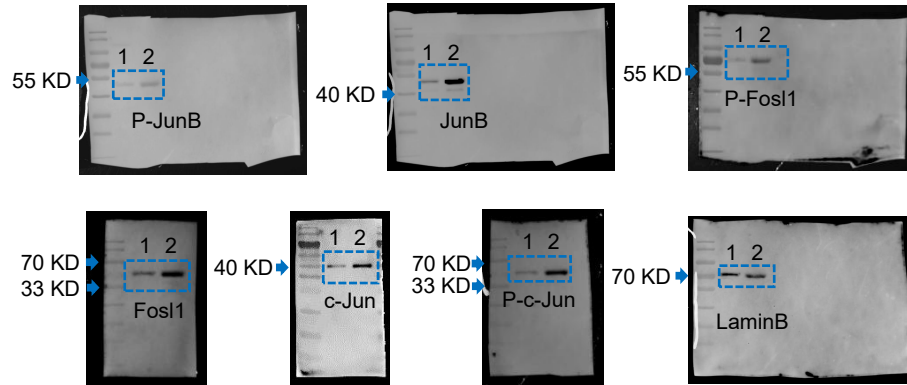

The same gel; lane1: FetuA-, lane2: FetuA+.

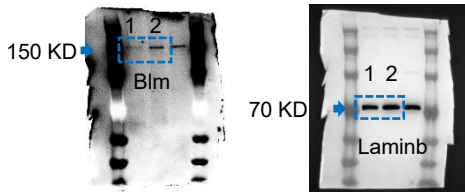

Extended Data Fig.6f

The same gel.

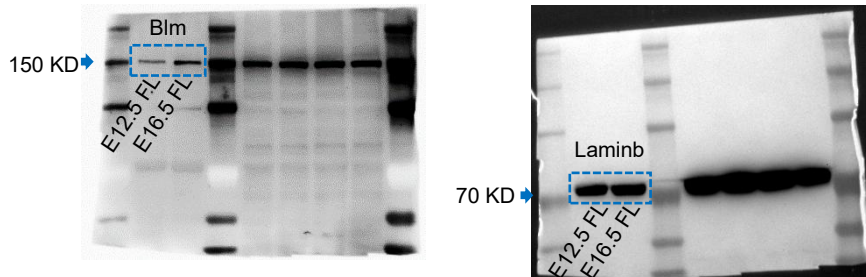

Fig.4g

The same gel; lane1: FetuA-SR11032-, lane2: FetuA+SR11032-, lane3: FetuA+SR11032+ .

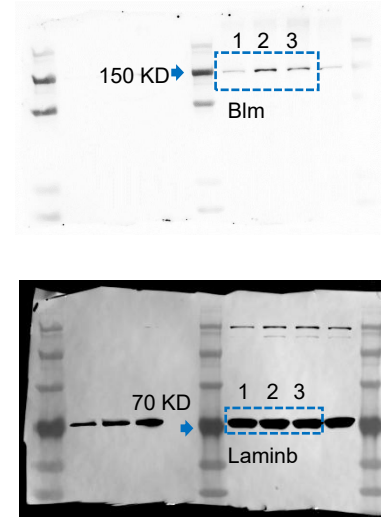

Extended Data Fig.5e

Same batch of lysates; resolved on different gels;

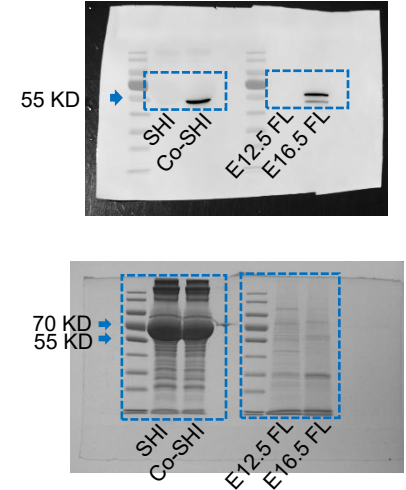

Extended Data Fig.6g

The same gel.

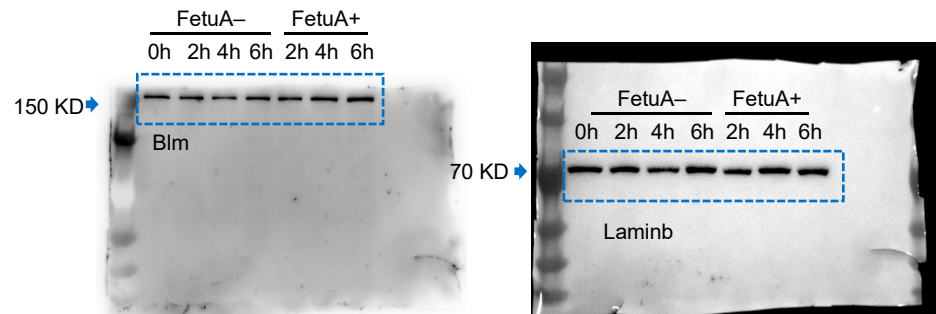

Supplement: 41586_2024_8307_MOESM3_ESM.pdf [file 41586_2024_8307_MOESM3_ESM.pdf]
